# Supplementary material for: Differential expression between drought-tolerant and drought-sensitive sugarcane under mild and moderate water stress as revealed by a comparative analysis of leaf transcriptome
Source: PubMed Central journal article supplement (PMC7676377; doi:10.7717/peerj.9608), 2020-07-28

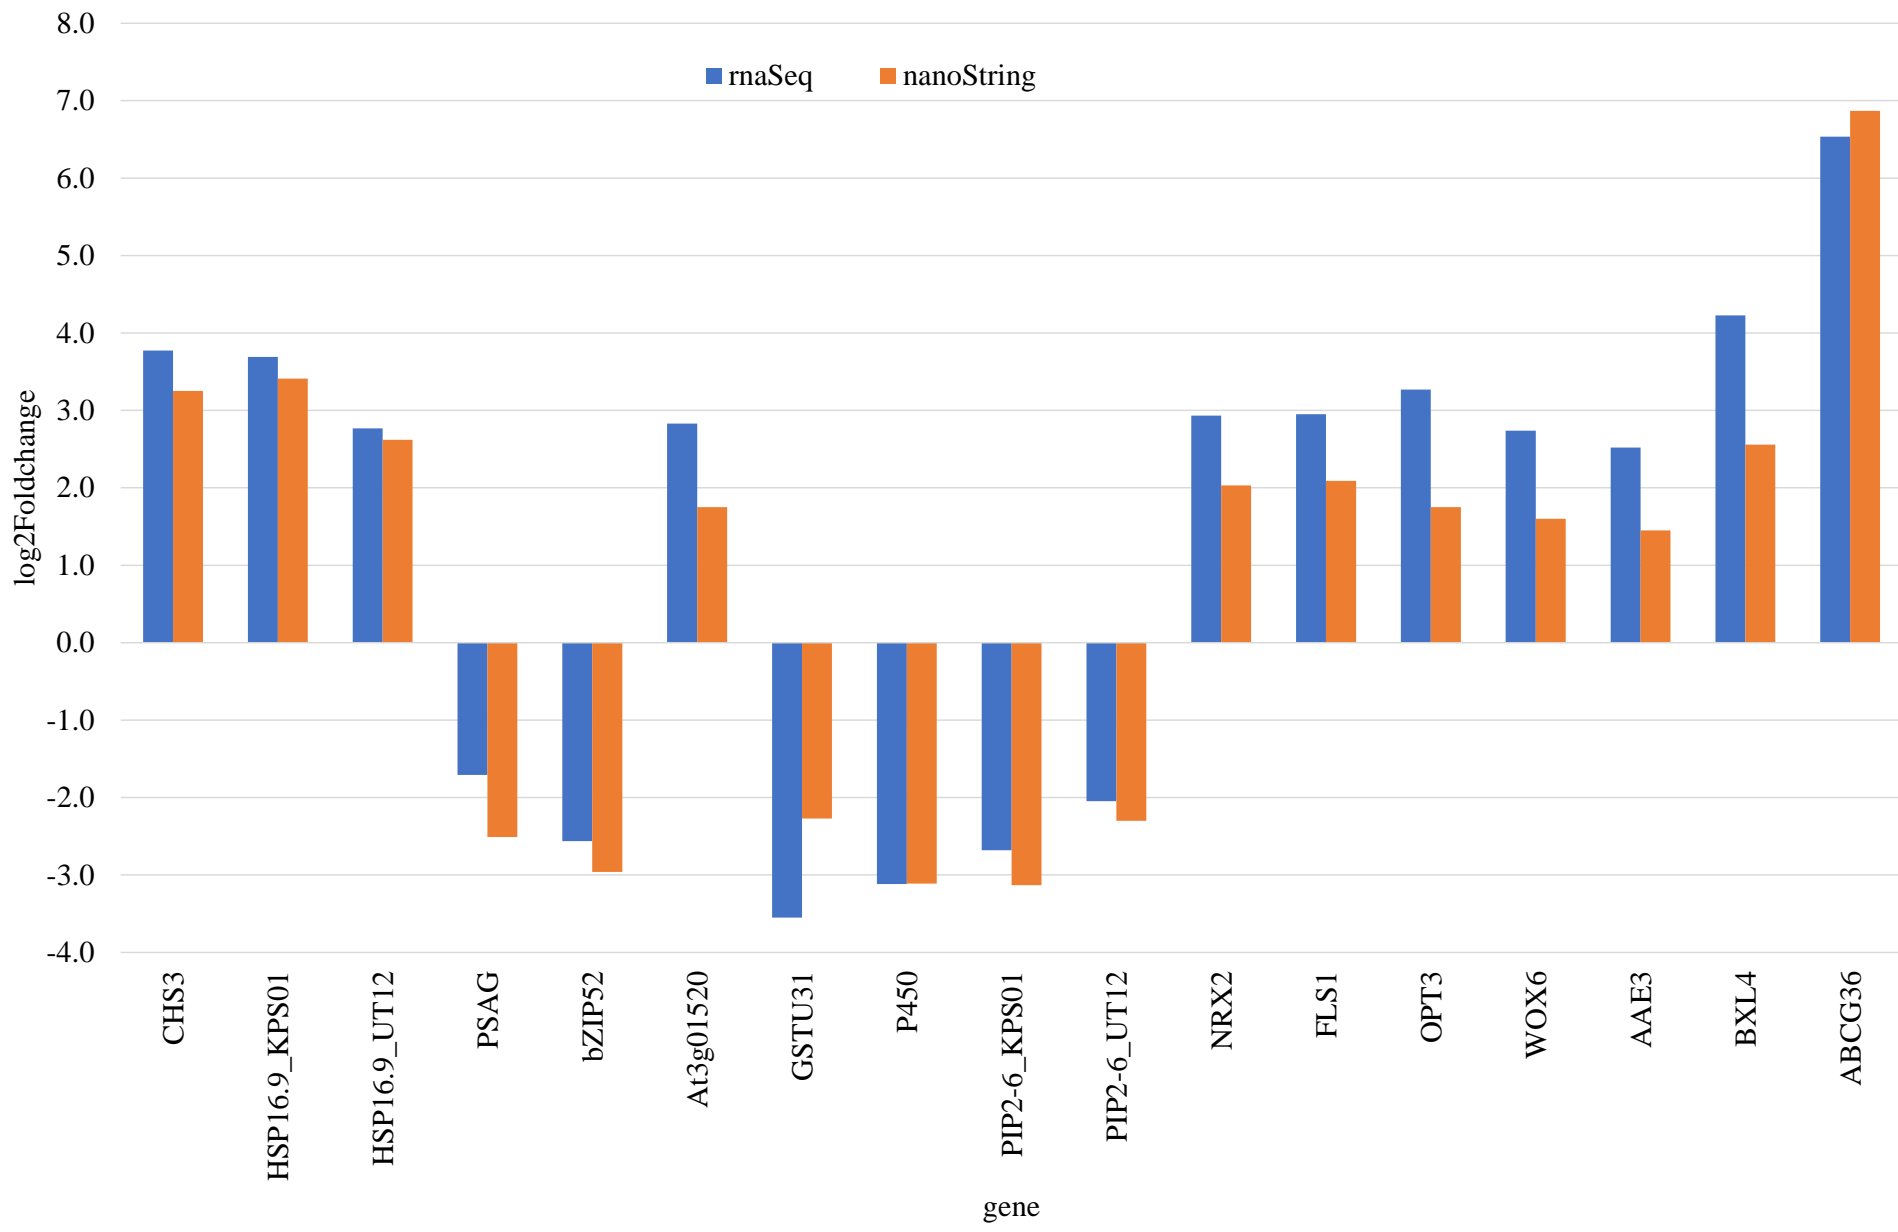

Supplement: peerj-08-9608-s001.pdf [file peerj-08-9608-s001.pdf]
