# Supplementary material for: Differential expression between drought-tolerant and drought-sensitive sugarcane under mild and moderate water stress as revealed by a comparative analysis of leaf transcriptome
Source: PeerJ. 2020 Jul 28;8:e9608. doi: 10.7717/peerj.9608 (PMC7676377; doi:10.7717/peerj.9608)
Supplement: Supplemental Information 2 [file peerj-08-9608-s002.xlsx]

## Sheet: Sheet1
Table S1 Yield and related parameters measured under field condition for the drought-tolerant genotype (Kps01-12) and the drought-sensitive genotype (UT12)
Genotype	Yield* (Tonne per hectare)			Weight/stalk* (kg.)			Average stalks/clump*
	WW	WS	decrease (%)	WW	WS	decrease (%)	WW	WS	decrease (%)
Kps01-12	139.375	104.375	-25.1121	2.1	1.5	-28.5714	7.9	4.5	-43.038
UT12	121.25	41.25	-65.9794	2.2	1	-54.5455	7.1	2.8	-60.5634
WW=well-watered
WS=water-stressed
decrease=percentage of change when compared quantity under WS to that under WW condition
*The data was compiled from planting area by Dr. Prapat Punpee and Mr. Warodom Wirojsirasak, from Mitr Phol Company.
Sugarcanes were grown at Mitr Phol Sugarcane Research Center Co., Ltd. at Phukhieo District, Chaiyaphum Provinc during December 2017 – December 2018.
Sugarcane plants in the control plots were supplied with water of ~ 60 cubic/rai twice a month from December to May. Sugarcane plants in the treatment plots did not receive such water supply.
