# Supplementary material for: Differential expression between drought-tolerant and drought-sensitive sugarcane under mild and moderate water stress as revealed by a comparative analysis of leaf transcriptome
Source: PeerJ. 2020 Jul 28;8:e9608. doi: 10.7717/peerj.9608 (PMC7676377; doi:10.7717/peerj.9608)
Supplement: Supplemental Information 3 [file peerj-08-9608-s003.xlsx]

## Sheet: Sheet1
Table S2 Details of RNA-seq data from Ion Proton and percentage of sequence matching with monoploid reference genome of sugarcane.
Stress level	Genotypes	Treatments	Replicates	>= Q20 Bases	Reads	Mean read length (bp)	Uniquely mapped reads (%)	Number of mapped genes
Mild water stress	Kps01-12	WS	rep.1	407000000	3030000	146	0.61	13697
			rep.2	386000000	2990000	139	0.62	14319
		WW	rep.1	664000000	4360000	167	0.6	14767
			rep.2	543000000	4430000	132	0.6	14160
	UT12	WS	rep.1	1040000000	8210000	137	0.61	16292
			rep.2	773000000	6560000	126	0.64	17123
		WW	rep.1	821000000	6410000	138	0.62	16654
			rep.2	544000000	3910000	154	0.61	15913
Moderate water stress	Kps01-12	WS	rep.1	826000000	5680000	161	0.6	15469
			rep.2	1260000000	8920000	156	0.61	16965
		WW	rep.1	1460000000	11000000	145	0.6	16372
			rep.2	993000000	7640000	141	0.61	15919
	UT12	WS	rep.1	568000000	4130000	150	0.59	13538
			rep.2	571000000	4030000	154	0.6	13597
		WW	rep.1	454000000	3250000	151	0.59	11117
			rep.2	664000000	4630000	161	0.6	13909
