# Supplementary material for: Differential expression between drought-tolerant and drought-sensitive sugarcane under mild and moderate water stress as revealed by a comparative analysis of leaf transcriptome
Source: PeerJ. 2020 Jul 28;8:e9608. doi: 10.7717/peerj.9608 (PMC7676377; doi:10.7717/peerj.9608)
Supplement: Supplemental Information 4 [file peerj-08-9608-s004.xlsx]

## Sheet: R570 sugarcane 
Table S3 Statistic of mapping RNA reads to R570 sugarcane genome
sample	input reads	Uniquely mapped reads	Uniquely mapped reads %	% of reads mapped to too multiple loci	% of reads unmapped: too short
T1_2S1	2243238	1495844	0.6668	0.0293	0.2712
T1_2S2	2447104	1657598	0.6774	0.0284	0.2619
T1_2W1	2911914	1964036	0.6745	0.0369	0.2447
T1_2W2	3182669	2218338	0.697	0.0351	0.2406
T1_6S1	6156310	4356625	0.7077	0.0285	0.2323
T1_6S2	5607085	3908581	0.6971	0.0305	0.2418
T1_6W1	5711484	3880291	0.6794	0.0263	0.2592
T1_6W2	3236277	2163071	0.6684	0.0341	0.2564
T2_2S1	4063391	2704511	0.6656	0.0353	0.2574
T2_2S2	6662846	4450354	0.6679	0.0336	0.2585
T2_2W1	7486345	4982651	0.6656	0.0393	0.2603
T2_2W2	5334909	3601170	0.675	0.0368	0.2557
T2_6S1	2925554	1908330	0.6523	0.0258	0.2875
T2_6S2	2497532	1580696	0.6329	0.0261	0.306
T2_6W1	1770150	1133063	0.6401	0.0262	0.302
T2_6W2	3274803	2211195	0.6752	0.0282	0.2557

## Sheet: Saccharum spontaneum AP85-441 
Table S3 Statistic of mapping RNA reads to Saccharum spontaneum genome
sample	input reads	Uniquely mapped reads	Uniquely mapped reads %	% of reads mapped to too multiple loci	% of reads unmapped: too short
T1_2S1	2243238	819254	0.3652	0.257	0.3375
T1_2S2	2447104	842698	0.3444	0.3349	0.2868
T1_2W1	2911914	971684	0.3337	0.2891	0.3152
T1_2W2	3182669	997442	0.3134	0.26	0.3857
T1_6S1	6156310	1988661	0.323	0.3277	0.307
T1_6S2	5607085	1855047	0.3308	0.4021	0.2406
T1_6W1	5711484	1832715	0.3209	0.4545	0.1977
T1_6W2	3236277	1185911	0.3664	0.4128	0.1875
T2_2S1	4063391	1409217	0.3468	0.2924	0.3103
T2_2S2	6662846	2238659	0.336	0.3004	0.3129
T2_2W1	7486345	2501446	0.3341	0.2266	0.3821
T2_2W2	5334909	1753027	0.3286	0.2635	0.3562
T2_6S1	2925554	1124137	0.3842	0.2613	0.2753
T2_6S2	2497532	915292	0.3665	0.2541	0.32
T2_6W1	1770150	636526	0.3596	0.1806	0.4089
T2_6W2	3274803	1143691	0.3492	0.2253	0.3625

## Sheet: Sorghum
Table S3 Statistic of mapping RNA reads to Sorghum bicolor genome
sample	input reads	Uniquely mapped reads	Uniquely mapped reads %	% of reads mapped to too multiple loci	% of reads unmapped: too short
T1_2S1	2243238	973219	0.4338	0.2908	0.116
T1_2S2	2447104	1346250	0.5501	0.2123	0.1091
T1_2W1	2911914	1513344	0.5197	0.1673	0.1176
T1_2W2	3182669	1336746	0.42	0.2379	0.1139
T1_6S1	6156310	3140192	0.5101	0.2752	0.0877
T1_6S2	5607085	3446200	0.6146	0.1989	0.093
T1_6W1	5711484	3929818	0.6881	0.1587	0.0845
T1_6W2	3236277	2131450	0.6586	0.1451	0.1059
T2_2S1	4063391	2091789	0.5148	0.224	0.1103
T2_2S2	6662846	3544965	0.532	0.1802	0.1279
T2_2W1	7486345	2998994	0.4006	0.2321	0.1272
T2_2W2	5334909	2386156	0.4473	0.24	0.1201
T2_6S1	2925554	1352067	0.4622	0.2075	0.0996
T2_6S2	2497532	1124630	0.4503	0.2036	0.1142
T2_6W1	1770150	565791	0.3196	0.2981	0.1225
T2_6W2	3274803	1423932	0.4348	0.2517	0.1218
